# Supplementary material for: Enantioselective synthesis of allenyl carbinols by the CBS reduction in nitroethane: dramatic solvent effect for reactivity and enantioselectivity
Source: Royal Society of Chemistry journal article supplement (doi:10.1039/b407387h), 2004-01-01
Supplement: b407387h.doc [file b407387h.doc]

#
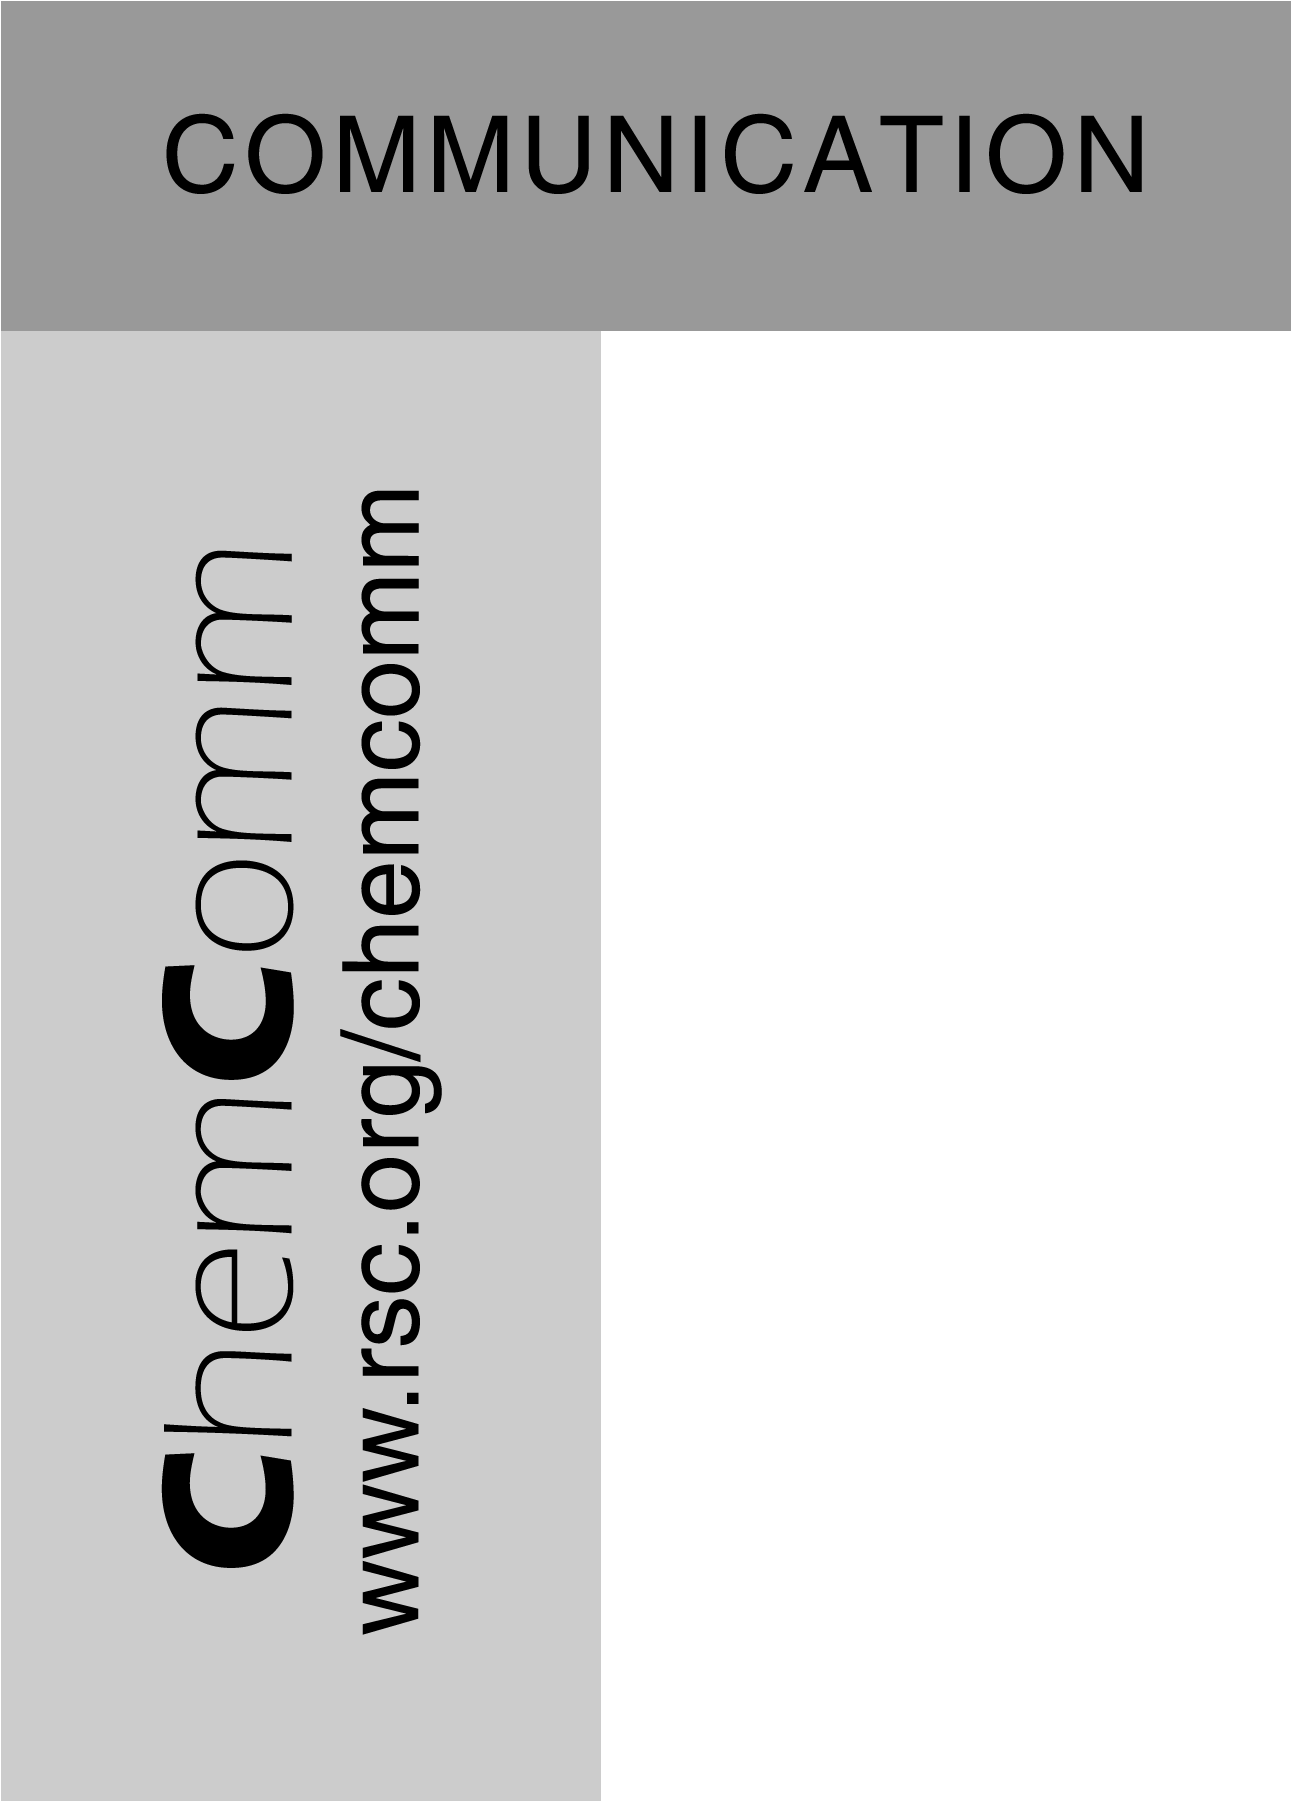
Electronic Supplementary Information

Enantioselective synthesis of allenyl carbinols by the CBS reduction in nitroethane: dramatic solvent effect for reactivity and enantioselectivity

**Chan-Mo Yu,*Chunsan Kim and Jae-Hong Kweon**

Department of Chemistry and Laboratory for Metal-Catalyzed Reactions

Sungkyunkwan University, Suwon 440-746, Korea

**General:** All reactions were run in flame dried glassware under an atmosphere of nitrogen. Nitroethane was dried over P2O5 or CaH2 overnight, and distilled prior to use. Tetrahydrofuran (THF) and diethyl ether was dried by refluxing over sodium/benzophenone ketyl until a permanent purple coloration was presented, and distilled prior to use. All liquid reagents purchased from the Aldrich were distilled properly prior to use, unless otherwise indicated. Purification was conducted by flash column chromatography on silica gel (230-400 mesh), eluting with a mixture of hexane and ethyl acetate, unless otherwise stated. All reactions were monitored by thin layer chromatography carried out on Merck silica gel plate (60 F254) using UV light as visualizing agent and ethanolic anisaldehyde solution and heat as developing agent. FT-IR spectra were recorded on a Nicolet 205. 1H NMR spectra were recorded on a Varian Unity Inova at 500 MHz in CDCl3 as a solvent with TMS or residual chloroform as the internal standard. 13C NMR spectra were measured on a Varian Unity Inova at 125 MHz in CDCl3 as a solvent. EI-mass spectra were obtained on a VG-Instrument Trio 2000 system at 70 eV. Optical rotations were measured on a JASCO P-1020 digital polarimeter at ambient temperature. Enantiomeric excesses were determined by preparation of (+)-MTPA ester derivatives, analysis by 500 MHz 1H NMR spectroscopy, and comparison with corresponding racemic sample and/or by HPLC analysis using chiral column (Chiracel OD-H or OJ-H column, 3-5% PriOH in hexanes, UV 254 nm, flow 1.0 mL/min). The absolute configuration of the predominating enantiomer for adducts 2 and **4** was unambiguously established by comparison of values of specific rotations and 1H NMR spectra of Mosher ester with previously known alcohols, See: C.-M. Yu, S.-K. Yoon, K. Baek and J.-Y. Lee, *Angew. Chem*. *Int. Ed*., 1998, **37**, 2392-2394; E. J. Corey, C.-M. Yu and D.-H. Lee, *J. Am. Chem. Soc.*, 1990, **112**, 878-879.

**Spectroscopic data for starting materials 3a-f and 6a-e.**

**4-Methyl-1-phenyl-hexa-4,5-dien-3-one (3a)**: A yellow oil, TLC, *Rf* = 0.68 (EtOAc / Hexane = 1 : 3); FT-IR (neat) 3028, 2928, 1935, 1677 cm-1; 1H NMR (500 MHz CDCl3) δ 1.78 (dd, 3H, *J* = 3.1, 3.1 Hz, C*H3*), 2.98 (m, 2H, PhC*H*2CH2), 2.91 (m, 2H, PhCH2C*H2*), 5.09 (q, 2H, *J* = 3.1 Hz, C=C*H2*), 7.18 (m, 3H, *Ph*), 7.26 (m, 2H, *Ph*); 13C NMR (125 MHz, CDCl3) δ 216.6, 200.5, 141.6, 128.7, 128.6, 126.3, 103.8, 78.9, 40.9, 31.1, 13.3.

**4-Ethyl-1-phenyl-hexa-4,5-dien-3-one (3b)**: A yellow oil, TLC, *Rf* = 0.72 (EtOAc / Hexane = 1 : 3); FT-IR (neat) 3026, 2967, 2930, 1933, 1675 cm-1; 1H NMR (500 MHz CDCl3) δ 0.99 (t, 3H, *J* = 7.3 Hz, CCH2C*H*3), 2.19 (tq, 2H, *J* = 3.3, 7.3 Hz, CC*H*2CH3), 2.94 (m, 2H, PhC*H*2CH2), 2.94 (m, 2H, PhCH2C*H*2), 5.18 (t, 2H, *J* = 3.3 Hz, C=C*H*2), 7.19 (m, 3H, *Ph*), 7.28 (m, 2H, *Ph*); 13C NMR (125 MHz CDCl3) δ 216.3, 200.3, 141.6, 128.6, 128.6, 126.2, 110.4, 80.5, 41.3, 31.1, 19.7, 12.4.

**3,6-Dimethyl-hepta-1,2-dien-4-one (3c)**: A yellow oil, TLC, *Rf* = 0.7(EtOAc / Hexane = 1 : 5); FT-IR (neat) 2958, 2930, 2871, 1933, 1715 cm-1; 1H NMR (500 MHz, CDCl3) δ 0.90 (d, 6H, *J* = 7.0 Hz, C*H*3CHC*H*3), 1.78 (t, 3H, *J* = 3.0 Hz, CC*H*3), 2.12 (m, 1H, CH3C*H*CH3 ), 2.53 (d, 2H, *J* = 7.0 Hz, CH3CHCH3C*H*2), 5.12 (q, 2H, *J* = 3.0 Hz, C=C*H*2); 13C NMR (125 MHz, CDCl3) δ 216.8, 201.4, 104.3, 78.6, 47.9, 26.1, 25.6, 22.8, 13.3.

**3-Ethyl-6-methyl-hepta-1,2-dien-4-one (3d)**: A yellow oil; TLC, *Rf* = 0.73 (EtOAc/Hexane = 1: 5); FT-IR (neat) 2957, 2871, 1934, 1715 cm-1; 1H NMR (500 MHz CDCl3) δ 0.91 (d, 6H, *J* = 6.8 Hz, C*H*3CHC*H*3), 1.0 (t, 3H, *J* = 7.3 Hz, CCH2C*H*3), 2.12 (n, 1H, *J* = 6.8, CH3C*H*CH3), 2.19 (tq, 2H, *J* = 3.1, 7.3, CC*H*2CH3), 2.53 (d, 2H, *J* = 7.0 Hz, CH3CHCH3C*H*2), 5.19 (t, 2H, *J* = 3.1 Hz, C=C*H*2); 13C NMR (125 MHz, CDCl3) δ 216.6, 201.2, 110.9, 80.2, 48.3, 31.1, 26.1, 22.8, 19.7, 12.4.

**3-Methyl-nona-1,2-dien-4-one (3e)**: A yellow oil, TLC, *Rf* = 0.75 (EtOAc/Hexane = 1 : 5); FT-IR (neat) 2952, 2931, 2866, 1934, 1715cm-1; 1H NMR (500 MHz, CDCl3) δ 0.88 (t, 3H, *J* = 7.0Hz, C*H*3CH2CH2CH2CH2), 1.29 (m, 2H, CH3C*H*2CH2CH2CH2), 1.29 (m, 2H, CH3CH2C*H*2CH2CH2), 1.59 (q, 2H, *J* = 7.6 Hz, C*H*2CH2CO), 1.78 (t, 3H, *J* = 3.1 Hz, C*H*3), 2.64 (t, 2H, *J* = 7.6 Hz, CH2C*H*2CO), 5.12 (dd, 2H, *J* = 3.3, 6.0 Hz, C=C*H*2); 13C NMR (125 MHz, CDCl3) δ 216.6, 201.9, 103.8, 78.6, 39.1, 31.8, 24.9, 22.9, 14.3, 13.4.

**3-Ethyl-nona-1,2-dien-4-one (3f)**: A yellow oil, TLC, *Rf* = 0.8 (EtOAc/Hexane = 1 : 5); FT-IR (neat) 2958, 2931, 2871, 1934, 1715 cm-1; 1H NMR (500 MHz, CDCl3) δ 0.88 (t, 3H, *J* = 7.6 Hz, C*H*3CH2CH2), 0.99 (t, 3H, *J* = 7.6, CCH2C*H*3), 1.28 (m, 4H, CH3CH2C*H*2C*H*2CH2), 1.58 (q, 2H, *J* = 7.6 Hz, C*H*2CH2CO), 2.19 (tq, 2H, *J* = 3.4, 7.6 Hz, CC*H*2CH3), 2.64 (t, 2H, *J* = 7.6 Hz, C*H*CO), 5.19 (t, 2H, *J* = 3.4 Hz, C=C*H*2); 13C NMR (125 MHz, CDCl3) δ 216.2, 201.6, 110.4, 80.1, 39.5, 31.7, 24.9, 22.7, 19.7, 14.3, 12.4.

**6-Methoxy-1-phenyl-hex-4-yn-3-one (6a):** A yellow oil; TLC, *Rf* = 0.47 (Hexanes/EtOAc = 3 : 1); FT-IR (neat) 3340, 3072, 2900, 2213, 1990, 1678, 1603, 1453, 1143 cm-1; 1H NMR (500 MHz, CDCl3) δ 2.92 (m, 2H, CH2C*H2*CO), 2.99 (m, 2H, PhC*H2*CH2), 3.40 (s, 3H, CH2OC*H3*), 4.25 (s, 2H, CC*H*2OCH3), 7.25 (m, 5H, *Ph*); 13C NMR (125 MHz, CDCl3) δ 186.4, 140.3, 128.8, 128.6, 126.6, 88.2, 85.5, 59.8, 58.3, 47.1, 29.9

**4-Methoxy-1-phenyl-but-2-yn-1-one (6b):** A yellow oil; TLC, *Rf* = 0.39 (Hexanes/EtOAc = 3 : 1); FT-IR (neat) 3275, 3062, 2993, 2225, 1645, 1597, 1449, 1313, 1262, 1104, 795, 700 cm-1; 1H NMR (500 MHz, CDCl3) δ 3.51 (s, 3H, CH2OC*H3*), 4.40 (s, 2H, CC*H2*OCH3), 7.57 (m, 3H, *Ph*), 8.16 (dd, 2H, *J* = 1.12, 8.43 Hz, *Ph*); 13C NMR (125 MHz, CDCl3) δ 177.7, 136.7, 134.5, 129.8, 128.9, 90.1, 84.5, 60.0, 58.5

**5-Methoxy-pent-3-yn-2-one (6c):** A yellow oil; TLC, *Rf* = 0.35 (Hexanes/EtOAc = 3 : 1); FT-IR (neat) 3339, 2997, 2936, 2208, 1680, 1450, 1359, 1223, 1103, 1019, 903 cm-1 ; 1H NMR (500 MHz, CDCl3) δ 2.37 (s, 3H, C*H3*CO), 3.42 (s, 3H, CH2OC*H3*), 4.26 (s, 2H, CC*H2*OCH3); 13C NMR (125 MHz, CDCl3) δ 184.1, 87.4, 86.0, 59.8, 58.3, 32.8.

**1-Methoxy-hept-2-yn-4-one (6d):** A yellow oil; TLC, *Rf* = 0.58 (Hexanes/EtOAc = 3 : 1); FT-IR (neat) 3336, 2965, 2936, 2825, 2212, 1677, 1463, 1358, 1162, 1105, 900 cm-1; 1H NMR (500 MHz, CDCl3) δ 0.96 (t, 3H, *J* = 7.3 Hz, C*H3*CH2), 1.72 (m, 2H, *J* = 7.3 Hz, CH3C*H2*CH2), 2.26 (t, 2H, *J* = 7.3 Hz, C*H2*CO), 3.40 (s, 3H, CH2OC*H3*), 4.26 (s, 2H, CC*H2*OCH3); 13C NMR (125 MHz, CDCl3) δ 187.7, 87.5, 85.6, 69.8, 58.3, 47.5, 17.7, 13.7

**1-Benzyloxy-5-methoxy-pent-3-yn-2-one (6e):** A yellow oil; TLC, *Rf* = 0.58 (Hexanes/EtOAc = 1 : 1); FT-IR (neat) 3367, 3090, 3064, 3030, 2931, 2874, 2827, 2211, 1696, 1453, 1105, 739, 699 cm-1; 1H NMR (500 MHz, CDCl3) δ 3.41 (s, 3H, CH2OC*H3*), 4.24 (s, 2H, CC*H2*OCH3), 4.27 (s, 2H, OC*H2*CO), 4.65 (s, 2H, PhC*H2*), 7.35 (m, 5H, *Ph*); 13C NMR (125 MHz, CDCl3) δ 184.6, 137.2, 128.8, 128.4, 128.3, 90.8, 83.6, 75.9, 73.7, 59.8, 58.4

**Preparation of the CBS catalyst, 5a:** Toluene (15 mL) was added to (*S*)-( **_**)-α,α-Diphenyl-2-pyrrolidine-methanol (commercially available from Aldrich, 253 mg, 1 mmol) and MeB(OH)2 (Aldrich, 72 mg, 1.2 mmol) in a 25 mL round-bottom flask fitted with a Dean-Stark apparatus (sidearm filled with 4Å molecular sieves) and a reflux condenser. The reaction mixture was heated at 60 ºC for 1h before heating at reflux temperature and heating at reflux was maintained for 5h. The toluene was removed by distillation through the Dean-Stark sidearm until about 3mL were left. After the reaction mixture was cooled to 23 ºC, the Dean-Stark apparatus was replaced by a rubber septum and the remaining toluene was removed in vacuo at 40 ºC. Nitroethane (freshly purified, 5.0 mL) was added to provide a 0.20 M solution of (*S*)-CBS-Me, **5a**, see: E. J. Corey and C. J. Helal, *Angew. Chem. Int. Ed.*, 1998, **37**, 2010.

**Typical procedure, (**–**)-(*R*)-4-Methyl-1-phenyl-4,5-dien-3-ol (4a):** To a solution of **7a** (azeotropically dried with toluene under an inert atmosphere, 0.27mmol, 50mg) in EtNO2 (0.3 mL) was treated with **9a** (0.027mmol, 0.134 mL of 0.2 M solution in EtNO2). The solution was cooled to –78 ºC. A solution of catecholborane (0.53 mmol, 0.057 mL) in nitroethane (0.3 mL) was cooled to –78 ºC and this solution was then added dropwise over 10 min. After 1h of stirring, MeOH (0.1mL) was added, the solution was warmed to 23 ºC, diluted with ether, washed with 2:1 1N NaOH-saturated NaHCO3 until the aqueous layer was colorless, washed with brine, dried over anhydrous MgSO4, and concentrated in vauco. The residue was purified by column chromatography on silica gel (Hexane:EtOAc, 9:1) to provided **7a** (47mg, 0.25 mmol, 93%) as a colorless oil: TLC, *Rf* = 0.48 (EtOAc / Hexane = 1 : 3); [α]D25 = – 51.3 o (c = 0.1 in CHCl3); FT-IR (neat) 3048, 3019, 2926, 2856, 1957 cm-1; 1H NMR (500 MHz, CDCl3) δ 1.58 (s, 1H, O*H*), 1.72 (t, 3H, *J* = 3.1 Hz, C*H3*), 1.85 (m, 1H, PhCH2CH*H*), 1.94 (m, 1H, PhCH2C*H*H), 2.68 (m, 1H, PhCH*H*CH2), 2.75 (m, 1H, PhC*H*HCH2), 4.06 (m, 1H, C*H*OH), 4.79 (m, 2H, C=C*H*2), 7.20 (m, 2H, *Ph*), 7.28 (m, 2H, *Ph*); 13C NMR (125 MHz, CDCl3) δ 205.2, 142.2, 128.7, 128.6, 126.1, 102.1, 72.0, 37.1, 32.0, 29.9, 14.7; HRMS calcd for C13H16O: 188.1201.found: 188.1198; HPLC analysis, Chiralcel OD-H, Hexane / IPA = 95 : 5, *t*R ( major : minor = 15.51 : 12.25), 93% *ee*.

**(**–**)-(3*R*)-4-Ethyl-1-phenyl-hexa-4,5-dien-3-ol (4b)**: A colorless oil, TLC, *Rf* = 0.53 (EtOAc / Hexane, 1 : 3); [α]D25 = – 23.7 o (c = 0.1 in CHCl3); FT-IR (neat) 3406, 3021, 2924, 2855, 1953 cm-1; 1H NMR (500 MHz, CDCl3) δ 1.04 (t, 3H, *J* = 7.3 Hz, CCH2C*H*3), 1.59 (d, 1H, *J* = 5.6 Hz, O*H*), 1.85 (m, 1H, PhCH*H*CH2), 2.0 (m, 1H, PhC*H*HCH2), 2.0 (m, 2H, CC*H*2CH3), 2.71 (m, 2H, PhCH2C*H*2), 4.06 (m, 1H, C*H*OH), 4.91 (m, 2H, C=C*H*2), 7.19 (m. 3H, *Ph*), 7.27 (m, 2H, *Ph*); 13C NMR (125 MHz, CDCl3) δ 204.5, 142.3, 128.7, 128.6, 126.0, 116.5, 79.6, 71.5, 37.6, 32.1, 21.3, 12.4; HPLC analysis, Chiralcel OD-H, Hexane / IPA = 95 : 5, *t*R ( major : minor = 15.08 : 12.73), 92% *ee*.

**(**–**)-(4*R*)-Dimethyl-hepta-1,2-dien-4-ol (4c)**: A colorless oil, TLC, *Rf* = 0.58(EtOAc / Hexane = 1 : 5); [α]D25 = – 12.7 o (c = 0.1 in CHCl3); FT-IR (neat) 3399, 2952, 2930, 2859, 1958 cm-1; 1H NMR (500 MHz, CDCl3) δ 0.93 (d, 6H, *J* = 6.5 Hz, C*H*3CHC*H*3), 1.45 (m, 2H, CH3CHCH3C*H*2 ), 1.45 (m,1H, CH3C*H*CH3), 1.60 (s, 1H, O*H*), 1.71 (t, 3H, *J* = 3.1 Hz, C*H*3), 4.12 (m, 1H, C*H*OH), 4.75 (dq, 2H, *J* = 2.0, 3.1 Hz, C=C*H*2); 13C NMR (125 MHz, CDCl3) δ 205.3, 102.5, 76.5, 71.2, 44.6, 25.1, 23.4, 22.7, 14.3; HRMS calcd for C9H16O: 140.1201.found: 140.1205; single diastereomer of (+)-MTPA ester to be >99% *ee*.

**(**–**)-(4*R*)-3-Ethyl-6-methyl-hepta-1,2-dien-4-ol (4d)**: A colorless oil, TLC, *Rf* = 0.63(EtOAc / Hexane = 1 : 5); [α]D25 = – 16.4 o (c = 0.1 in CHCl3); FT-IR (neat) 3432, 2956, 2931, 2859, 1964 cm-1; 1H NMR (500 MHz, CDCl3) δ 0.93 (dd, 6H, *J* = 1.7, 6.5 Hz, C*H*3CHC*H*3), 1.04 (t, 3H, *J* = 7.4 Hz, CCH2C*H*3), 1.45 (m. 2H, CH3CHCH3C*H*2), 1.45 (m, 1H, O*H*), 1.78 (ddt, 1H, *J* = 6.5, 6.8, 12.9 Hz, CH3C*H*CH3), 2.02 (m, 1H, CC*H*2CH3), 4.11 (m, 1H, C*H*OH), 4.86 (dt, 2H, *J* = 2.0, 3.7 Hz, C=C*H*2); 13C NMR (125 MHz, CDCl3) δ 204.6, 109.9, 79.1, 70.7, 45.2, 25.5, 23.6, 22.9, 21.0, 12.4; HRMS calcd for C10H18O: 154.1358.found: 154.1355; single diastereomer of (+)-MTPA ester to be >99% *ee*.

**(**–**)-(4*R*)-3-methyl-nona-1,2-dien-4-ol (4e)**: A colorless oil, TLC, *Rf* = 0.64(EtOAc / Hexane = 1 : 5); [α]D25 = – 9.3 o (c = 0.1 in CHCl3); FT-IR (neat) 3412, 3017, 2926, 2855, 1955 cm-1; 1H NMR (500 MHz, CDCl3) δ 0.89 (t, 3H, *J*=7.0 Hz, C*H*3CH2CH2CH2CH2), 1.34 (m, 2H, CH3C*H*2CH2CH2CH2), 1.41 (m, 2H, CH3CH2C*H*2CH2CH2), 1.54 (m, 2H, CH3CH2CH2C*H*2CH2), 1.58 (m, 1H, O*H*), 1.62 (m, 2H, CH2C*H*2CHOH), 1.71 (t, 3H, *J* = 3.1 Hz, C*H*3), 4.0 (m, 1H, C*H*OH), 4.76 (dq, 2H, *J* = 2.3, 3.1 Hz, C=C*H*2); 13C NMR (125 MHz, CDCl3) δ 205.2, 102.2, 76.7, 35.1, 31.9, 25.9, 22.9, 14.5, 14.3; HRMS calcd for C10H18O: 154.1358.found: 154.1358; single diastereomer of (+)-MTPA ester to be >99% *ee*.

**(**–**)-(4*R*)-3-Ethyl-nona-1,2-dien-4-ol (4f)**: A colorless oil, TLC, *Rf* = 0.7(EtOAc/ Hexane = 1: 5); [α]D25 = – 19.4 o (c = 0.1 in CHCl3); FT-IR (neat) 3398, 2958, 2869, 2927, 1954 cm-1; 1H NMR (500 MHz, CDCl3) δ 0.88 (dt, 3H, *J* = 4.2, 7.0 Hz, C*H*3CH2CH2CH2CH2), 1.04 (t, 3H, *J* = 7.1, CCH2C*H*3), 1.3 (m, 6H, CH3C*H*2C*H*2C*H*2CH2), 1.5 (d, 1H, *J* = 5.6 Hz, O*H*), 1.62 (m, 2H, CH3CH2CH2CH2C*H*2), 2.0 (m, 2H, CC*H*2CH3), 4.04 (m, 1H, C*H*OH), 4.87 (dt, 2H, *J* = 2.3, 3.7 Hz, C=C*H*2); 13C NMR (125 MHz CDCl3) δ 204.5, 109.7, 79.2, 72.3, 35.8, 32.0, 25.4, 22.9, 21.2, 14.3, 12.4; HRMS calcd for C11H20O: 168.1514.found: 168.1517; single diastereomer of (+)-MTPA ester to be >99% *ee*.

**Typical Procedure, (+)-(3*S*)-6-Methoxy-1-phenyl-hex-4-yn-3-ol (7a):** To a solution of **7a** (azeotropically dried with toluene under an inert atmosphere, 0.247 mmol, 50 mg) in EtNO2 (0.3 mL) was treated with **9a** (0.062 mmol, 0.31 mL of 0.2 M solution in EtNO2). A solution of catecholborane (0.50 mmol, 0.051 mL) in nitroethane (0.3 mL) was cooled to –78 ºC and this solution was then added dropwise over 10 min. After 1 h of stirring, MeOH (0.1mL) was added, the solution was warmed to 23 ºC, diluted with ether, washed with 2:1 1N NaOH-saturated NaHCO3 until the aqueous layer was colorless, washed with brine, dried over anhydrous MgSO4, and concentrated in vauco. The residue was purified by column chromatography on silica gel (Hexane:EtOAc, 9:1) to provided **7a** (48 mg, 0.235 mmol, 95%) as a colorless oil: TLC, *Rf* = 0.24 (EtOAc / Hexane = 1 : 3); [α]D20= +24.58 o (c *=* 0.34 in CHCl3); FT-IR (neat) 3409, 3025, 2861, 1947, 1599, 1452, 1364, 1091, 745, 701 cm-1; 1H NMR (500 MHz, CDCl3) δ 1.84 (bs, 1H, O*H*), 2.05 (m, 2H, CH2C*H2*C), 2.82 (t*,* 2H, *J* = 7.9 Hz, PhC*H2*CH2), 3.40 (s , 3H, CH2OC*H3*), 4.16 (d, 2H, *J* = 1.7 Hz, CC*H2*OCH3), 4.44 (m, 1H, CH2C*H*OH), 7.25 (m, 5H, *Ph*); 13C NMR (125 MHz, CDCl3) δ 141.4, 128.7, 128.6, 126.3, 87.5, 81.3, 62.0, 60.1, 57.8, 39.4, 31.6; HRMS calcd for C13H16O2: 204.1150.found: 204.1151; HPLC; Chiralcel OD-H, Hexanes / IPA = 97 : 3, *t*R (major : minor = 22.26 : 28.04), 98% *ee*.

**(-)-(1*S*)-4-Methoxy-1-phenyl-but-2-yn-1-ol (7b):** A yellow oil; TLC, *Rf* = 0.19 (Hexanes/EtOAc = 3 : 1); [α]D20 = –41.5 o (c = 0.28 in CHCl3); FT-IR (neat) 3394, 3034, 2991, 2934, 2896, 2228, 1450, 1264, 1094, 733, 698 cm-1; 1H NMR (500 MHz, CDCl3) δ 2.33 (bs, 1H, O*H*), 3.41 (s, 3H, CH2OC*H3*), 4.20 (d, 2H, *J* = 1.9 Hz, CC*H2*OCH3), 5.53 (dd, 1H, *J* = 1.9, 5.62 Hz, PhC*H*OH), 7.44 (m, 5H, *Ph*); 13C NMR (125 MHz, CDCl3) δ 140.7, 128.9, 128.7, 126.8, 86.5, 82.8, 64.8, 60.2, 57.9; HRMS calcd for C11H12O2: 176.0837.found: 176.0841; HPLC; Chiralcel OD-H, Hexanes/IPA = 97 : 3, *t*R (major : minor = 21.74 : 28.91), 77% *ee*.

**(**-**)-(2*S*)-5-Methoxy-pent-3-yn-2-ol (7c):** A yellow oil; TLC, *Rf* = 0.19 (Hexanes/EtOAc = 3 : 1); [α]D20 =–9.3 o (c = 0.29 in CHCl3); FT-IR (neat) 3395, 2983, 2934, 2893, 2824, 1450, 1372, 1147, 1100, 1003, 887 cm-1; 1H NMR (500 MHz, CDCl3) δ 1.47 (d, 3H, *J* = 6.8 Hz, C*H3*CHOH), 3.38 (s, 3H, CH2OC*H3*), 4.12 (d, 2H, *J* = 1.7 Hz, CC*H2*OCH3), 4.58 (dq, 1H, *J* = 1.7, 6.8 Hz, CH3C*H*OH); 13C NMR (125 MHz, CDCl3) δ 88.7, 79.9, 60.1, 58.6, 57.8, 24.5; HRMS calcd for C6H10O2: 114.0681.found: 114.0683; HPLC; corresponding benzoyl ester, Chiralcel OJ-H, Hexanes / IPA = 95 : 5, *t*R (minor : major = 10.65 : 14.93), 91% *ee*.

**(_)-(4*S*)-1-Methoxy-hept-2-yn-4-ol (7d):**;A yellow oil; TLC, *Rf* = 0.22 (Hexanes / EtOAc = 3 : 1); [α]D20 = –13.5 o (c = 0.34 in CHCl3); FT-IR (neat) 3422, 2960, 2936, 2873, 2823, 1465, 1357, 1104, 1027, 906 cm-1; 1H NMR (500 MHz, CDCl3) δ 0.96 (t, 3H, *J* = 7.3 Hz, C*H3*CH2), 1.49 (m, 2H, CH3C*H2*CH2), 1.70 (m, 2H, C*H2*CHOH), 3.39 (s, 3H, CH2OC*H3*), 4.14 (d, 2H, *J* = 1.7 Hz, CC*H2*OCH3), 4.34 (t, 1H, *J* = 6.6 Hz, CC*H*OH); 13C NMR (125 MHz, CDCl3) δ 87.9, 80.8, 62.5, 60.1, 57.8, 40.1, 18.6, 13.9; HRMS calcd for C8H14O2: 142.0994.found: 142.0993; HPLC; corresponding benzoyl ester, Chiralcel OJ-H, Hexanes / IPA = 97 : 3, *t*R (minor : major = 14.10 : 17.90), 92% *ee*.

**(_)-(2*S*)-1-Benzyloxy-5-methoxy-pent-3-yn-2-ol (7e):** A yellow oil; TLC, *Rf* = 0.39 (Hexanes/EtOAc = 1 : 1); [α]D20 = –24.5 o (c = 0.43 in CHCl3); FT-IR (neat) 3415, 3034, 2926, 2896, 1965, 1887, 1827, 1451, 1359, 1098, 740, 699 cm-1; 1H NMR (500 MHz, CDCl3) δ 2.49 (bs, 1H, O*H*), 3.38 (s, 3H, CH2OC*H3*), 3.58 (dd, 1H, *J* = 7.4, 9.8 Hz, OC*H*HC), 3.67 (dd, 1H, *J* = 3.7, 9.8 Hz, OCH*H*C), 4.14 (d, 2H, *J* = 1.9 Hz, CC*H2*OCH3), 4.61(d, 1H, *J* = 11.8 Hz, PhC*H*H), 4.62 (m, 1H, CH2CHOH), 4.64 (d, 1H, *J* = 11.8 Hz, PhCH*H*), 7.34 (m, 5H, *Ph*); 13C NMR (125 MHz, CDCl3) δ 137.8, 128.7, 128.2, 128.1, 84.4, 81.8, 73.7, 73.7, 61.9, 60.1, 57.9; HRMS calcd for C13H16O3: 220.1099.found: 220.1097; HPLC; Chiralcel OD-H, Hexanes : IPA = 95 : 5, *t*R (minor : major = 13.78 : 16.12), 90% *ee*.

**Typical procedure, (+)-(3*S*)-1-Phenyl-hexa-4,5-dien-3-ol (2a):** To a suspension of lithium aluminium hydride (0.235mmol, 8.9mg) in dry ether (2 mL) was added carefully **6a** (0.196 mmol, 40mg) at 0 oC in ether (2 mL). The mixture was stirred for an additional 1 h, and then warmed to 20 oC. After 4 h, the reaction mixture was decomposed with the minimum amount of cold water (added dropwise until the gray slurry just turned white), and filtered; the solid was washed with ether (3×10ml) and the combined extracts were dried over anhydrous MgSO4. The organic solution was concentrated in vauco. The residue was purified by column chromatography on silica gel (Hexane /EtOAc, 9 : 1) to give **2a** (30.0 mg, 0.172 mmol, 88%) as a colorless oil; TLC, *Rf* = 0.52(Hexanes / EtOAc = 3 : 1); [α]D20 = + 9.5 o (c = 0.21 in CHCl3); FT-IR (neat) 3356, 3061, 2959, 1955, 1602, 1496, 1453, 1262, 1063, 1030, 699 cm-1; 1H NMR (500 MHz, CDCl3) δ 1.65 (bs, 1H, O*H*), 1.91 (ddt, 2H, *J* = 5.3, 5.9, 8.7 Hz, CH2C*H2*C), 2.76 (m, 2H, PhC*H2*CH2), 4.21 (m, 1H, CH2C*H*OH), 4.88 (dd, 1H, *J* = 2.5, 6.5 Hz, C=C*H*H), 4.91 (dd, 1H, *J* = 2.5, 6.5 Hz, C=CH*H*), 5.29 (ddd, 1H, J = 6.5, 6.5, 6.5 Hz, C*H*=C=CH2), 7.25 (m, 5H, *Ph*); 13C NMR (125 MHz, CDCl3) δ 142.0, 128.7, 128.6, 126.1, 94.9, 77.9, 77.9, 69.1, 39.2, 31.9; HRMS calcd for C12H14O: 174.1045.found: 174.1045.

**(_)-(1*S*)-1-Phenyl-buta-2,3-dien-1-ol (2b):** A colorless oil; TLC, *Rf* = 0.28 (Hexanes/EtOAc =  3 : 1); [α]D20 = –55.4 o (c = 0.82 in CHCl3); FT-IR (neat) 3350, 3029, 2893, 1955, 1601, 1493, 1452, 1024, 849, 762, 699 cm-1; 1H NMR (500 MHz, CDCl3) δ 2.12 (bs, 1H, O*H*), 4.93 (dd, 1H, *J* = 3.4, 6.5 Hz, C=CH*H*), 4.98 (dd, 1H, *J* = 3.4, 6.5 Hz, C=C*H*H), 5.27 (m, 1H, PhC*H*OH), 5.47 (ddd, 1H, *J* = 6.5, 6.5, 6.5 Hz, CHOHC*H*C=C=CH2), 7.35 (m, 5H, *Ph*); 13C NMR (125 MHz, CDCl3) δ 143.1, 128.7, 128.1, 126.3, 95.5, 78.5, 72.2.

**(_)-(2*S*)-Penta-3,4-dien-2-ol (2c):** A colorless oil; TLC, *Rf* = 0.27 (Hexanes/EtOAc = 3 : 1); [α]D20 = –16.7 o (c = 0.53 in CHCl3); FT-IR (neat) 3369, 2924, 2853, 1956, 1602, 1459, 1378, 1266, 1047 cm-1; 1H NMR (500 MHz, CDCl3) δ 1.33 (d, 3H, *J* = 6.2 Hz, C*H3*CHOH), 4.38 (m, 1H, CH3C*H*OH), 4.84 (dd, 1H, *J* = 3.9, 6.8 Hz, C=CH*H*), 4.87 (dd, 1H, *J* = 3.9, 6.8 Hz, C=C*H*H), 5.30 (ddd, 1H, *J* = 5.8, 5.8, 5.8 Hz, CHOHC*H*C=C=CH2); 13C NMR (125 MHz, CDCl3) δ 96.3, 77.9, 77.9, 66.9, 23.6.

**(_)-(4*S*)-Hepta-1,2-dien-4-ol (2d)**: A colorless oil; TLC, *Rf* = 0.48 (Hexanes / EtOAc = 3 : 1); [α]D20 = –13.4 o (c = 0.63 in CHCl3); FT-IR (neat) 3369, 2958, 2930, 2872, 1955, 1465, 1066, 1002, 841 cm-1; 1H NMR (500 MHz, CDCl3) δ 0.95 (t, 3H, *J* = 7.0 Hz, C*H3*CH2), 1.43 (m, 2H, CH3C*H2*CH2), 1.57 (m, 2H, C*H2*CHOH), 4.19 (m, 1H, CC*H*OH), 4.83 (dd, 1H, *J* = 2.8, 6.5 Hz, C=CH*H*), 4.87 (dd, 1H, *J* = 2.8, 6.5 Hz, C=C*H*H), 5.25 (ddd, 1H, *J* = 6.5, 6.5, 6.5 Hz, CHOHC*H*C); 13C NMR (125 MHz, CDCl3) δ 95.1, 77.6, 77.6, 69.7, 39.9, 18.8, 14.1; HRMS calcd for C7H12O: 112.0888.found: 174. 112.0891.

**(_)-(2*S*)-1-Benzyloxy-penta-3,4-dien-2-ol (2e):** A colorless oil; TLC, *Rf* = 0.42 (Hexanes/EtOAc = 1 : 1); [α]D20 = –21.3 o (c = 0.85 in CHCl3); FT-IR (neat) 3404, 3029, 2918, 2857, 1956, 1598, 1452, 1261, 1075, 740, 697 cm-1; 1H NMR (500 MHz, CDCl3) δ 2.41 (bs, 1H, O*H*), 3.47 (dd, 1H, *J* = 7.3, 9,6 Hz, OC*H*HC), 3.59 (dd, 1H, *J* = 3.7, 9.6 Hz, OCH*H*C), 4.41 (m, 1H, CH2C*H*OH), 4.59 (s, 2H, PhC*H2*), 4.84 (dd, 1H, *J* = 3.2, 6.5 Hz, C=CH*H*), 4.87 (dd, 1H, *J* = 3.2, 6.5 Hz, C=C*H*H), 5.26 (ddd, 1H, *J* = 6.5, 6.5, 6.5 Hz, CHOHC*H*C), 7.34 (m, 5H, *Ph*); 13C NMR (125 MHz, CDCl3) δ 138.1, 128.7, 128.1, 128.0, 91.1, 77.8, 77.8, 74,2, 73.7, 68.6; HRMS calcd for C12H14O2: 190.0994.found: 174. 190.0993.

**(*R*) -(-) –1-phenyl-3-buten-2-ol (8):** white power, TLC, R*f* = 0.33 (Hexane/EtOAc = 1 : 3); [α]*D*25 = +13.43 (c = 1.44 in CHCl3); FT-IR (neat) 3205, 3010, 2890 , 761, 697㎝-1; 1H NMR (300 MHz, CDCl3)  7.39-7.36 (m, 2H), 7.33-7.29 (m, 2H), 7.25-7.21 (m, 1H), 6.56 (d, 1H, *J* = 16Hz), 6.26 (dd, 1H, *J* = 16, 6.4Hz), 4.52-4.45 (m, 1H), 1.64 (s, 1H), 1.37 (d, 1H, *J* = *6.4* Hz); 13C NMR (125 MHz, CDCl3)  23.5, 72.2, 126.0, 126.4, 127.1, 127.9, 128.9, 133.4; HPLC, Chiralcel OD-H, Hexane / IPA = 97 : 3, *t*R ( major : minor = 18.2 : 12.4), 93% *ee.*

**(*R*)-(-)-1-phenylethan-1-ol (9): A** colorless oil, TLC, R*f* = 0.31 (Hexane/EtOAc = 1 : 3); [α]*D*25 = +54.1 (c = 1.34 in CHCl3); FT-IR (neat) 3423, 3015, 1382, 770, 693㎝-1; 1H NMR (300 MHz, CDCl3)  7.37-7.21 (m, 5H), 4.84 (q, 1H, *J* =6.3 Hz), 1.19 (s, 1H), 1.46 (d, 3H, *J* = *6.3* Hz); 13C NMR (125 MHz, CDCl3)  26.1, 70.3, 125.8, 127.3, 127.9, 142.2; Chiralcel OD-H, Hexane / IPA = 97 : 3, *t*R ( major : minor = 10.8 : 13.5), 94% *ee.*
